# Supplementary material for: Effect of anions in Au complexes on doping and degradation of graphene
Source: Royal Society of Chemistry journal article supplement (doi:10.1039/c3tc00046j), 2013-01-01
Supplement: c3tc00046j.pdf [file c3tc00046j.pdf]

## *Supporting Information*

# Role of anions in Au complex for doping and degradation of graphene

*Ki Chang Kwon<sup>a</sup>, Buem Joon Kim,<sup>b,c</sup> Jong-Lam Lee<sup>b,c,\*</sup>, and Soo Young Kim<sup>a,\*</sup>*

<sup>a</sup> School of Chemical Engineering and Materials Science, Chung-Ang University

221 Heukseok-dong, Dongjak-gu, Seoul 156-756, Republic of Korea

<sup>b</sup> Department of Materials Science and Engineering, Pohang University of Science and Technology

(POSTECH), Pohang, Gyeongbuk 790-784, Republic of Korea

<sup>c</sup> Division of Advanced Materials Science, Pohang University of Science and Technology (POSTECH),

Pohang, Gyeongbuk 790-784, Republic of Korea

### CORRESPONDING AUTHOR FOOTNOTE

\*E-mail: [jllee@postech.ac.kr](mailto:jllee@postech.ac.kr), Tel: 82-54-279-2152, Fax: 82-54-279-2399

[sooyoungkim@cau.ac.kr](mailto:sooyoungkim@cau.ac.kr), Tel: 82-2-820-5875, Fax: 82-2-824-3495

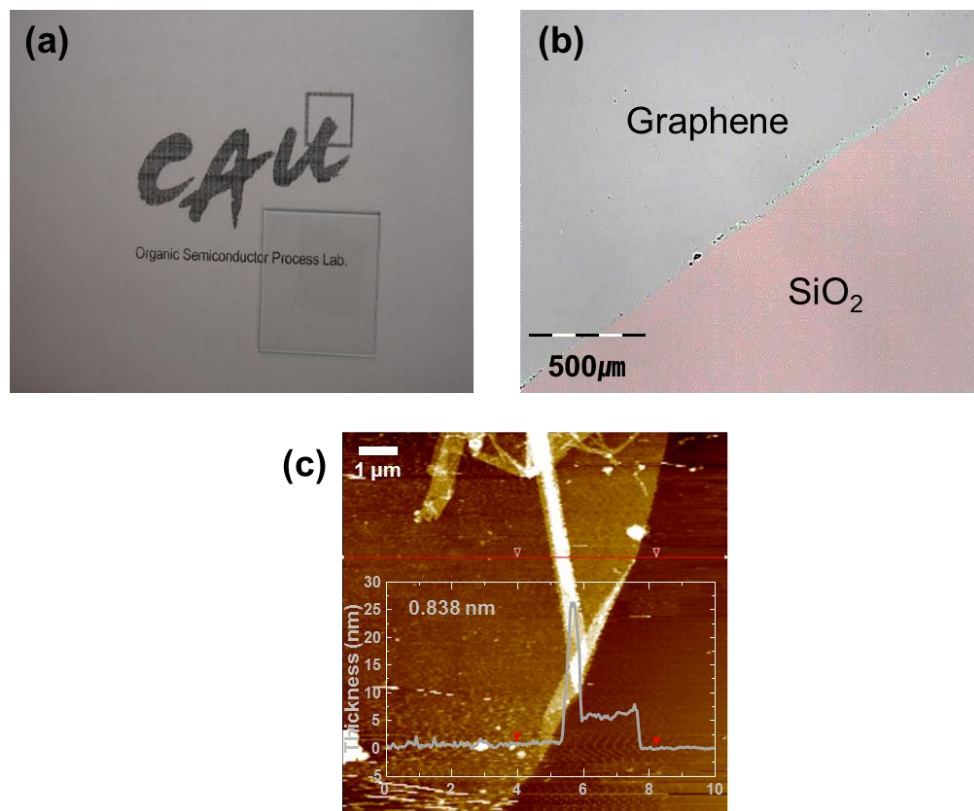

**Figure SI1.** a) The photographic image of pristine graphene on a glass substrate. b) The optical microscopic image of transferred pristine graphene on SiO<sub>2</sub> wafer. c) The thickness profile and AFM image of pristine graphene on SiO<sub>2</sub> wafer. The thickness of the few-layer graphene was 0.838 nm, indicating that 2 or 3 layers of graphene were synthesized.

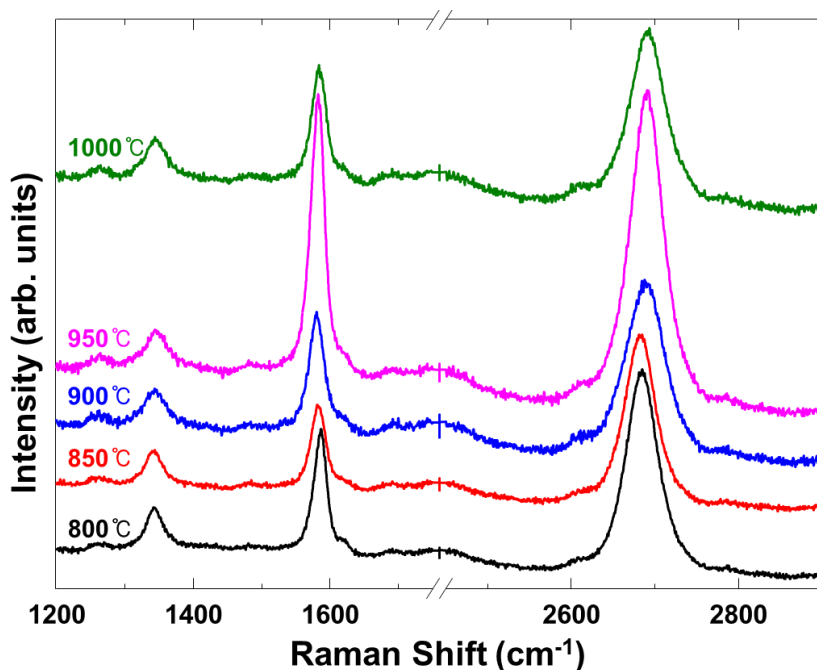

**Figure SI2.** The Raman spectroscopy of transferred pristine graphene sheets as a function of growth temperature. The gas ratio of CH<sub>4</sub> of H<sub>2</sub> was fixed at 6:1. The G peak around 1550 cm<sup>-1</sup> and 2D peak around 2700 cm<sup>-1</sup> was due to the in-plane bond-stretching motion of the sp<sup>2</sup>-bonded carbon atoms and the monolayer graphene, respectively. The D peak around 1360 cm<sup>-1</sup> is absent in perfect graphite and indicates the presence of disorders and defects. The 950 °C growth graphene had the highest I<sub>G</sub>/I<sub>D</sub> value and the acceptable value of I<sub>2D</sub>/I<sub>D</sub> for few-layer graphene sheets indicating that this was the best condition for few-layer graphene growth.

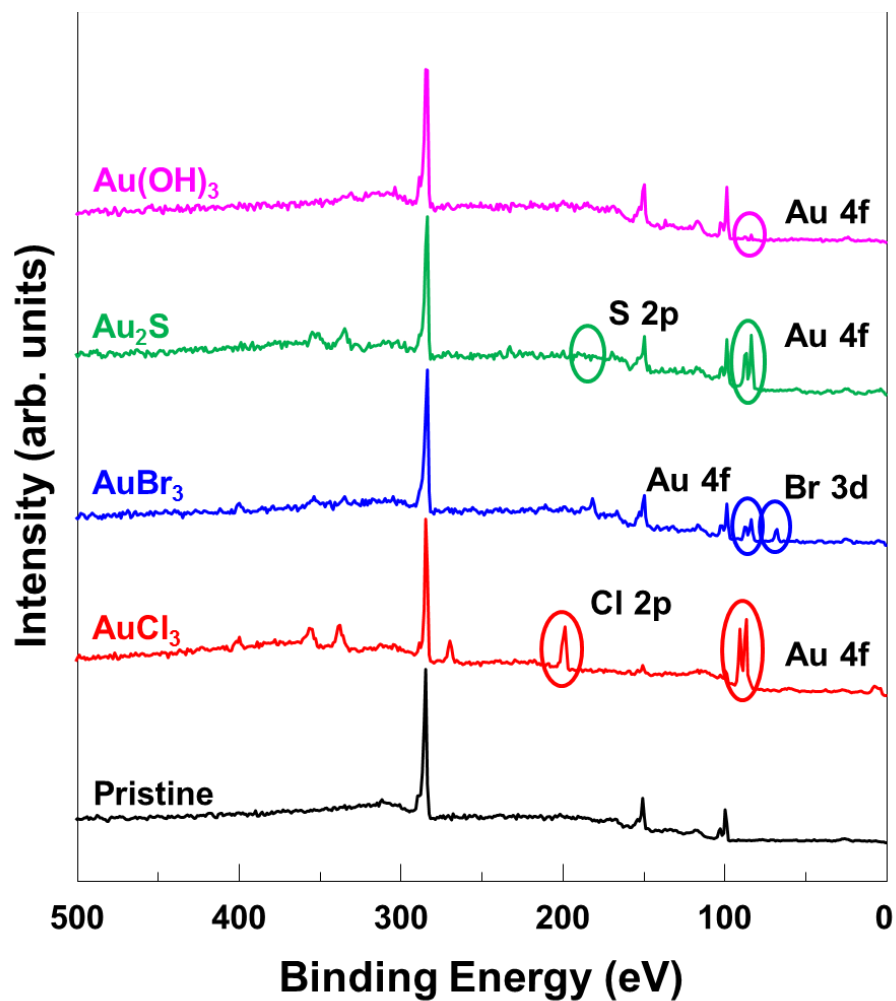

**Figure SI3.** The wide scan of the Au complex doped graphene sheets. Each Au complex doped graphene sheet had anions peak for Cl 2p, Br 3d, S 2p. The Au 4f peak indicated the presence of gold ions on the graphene sheets.

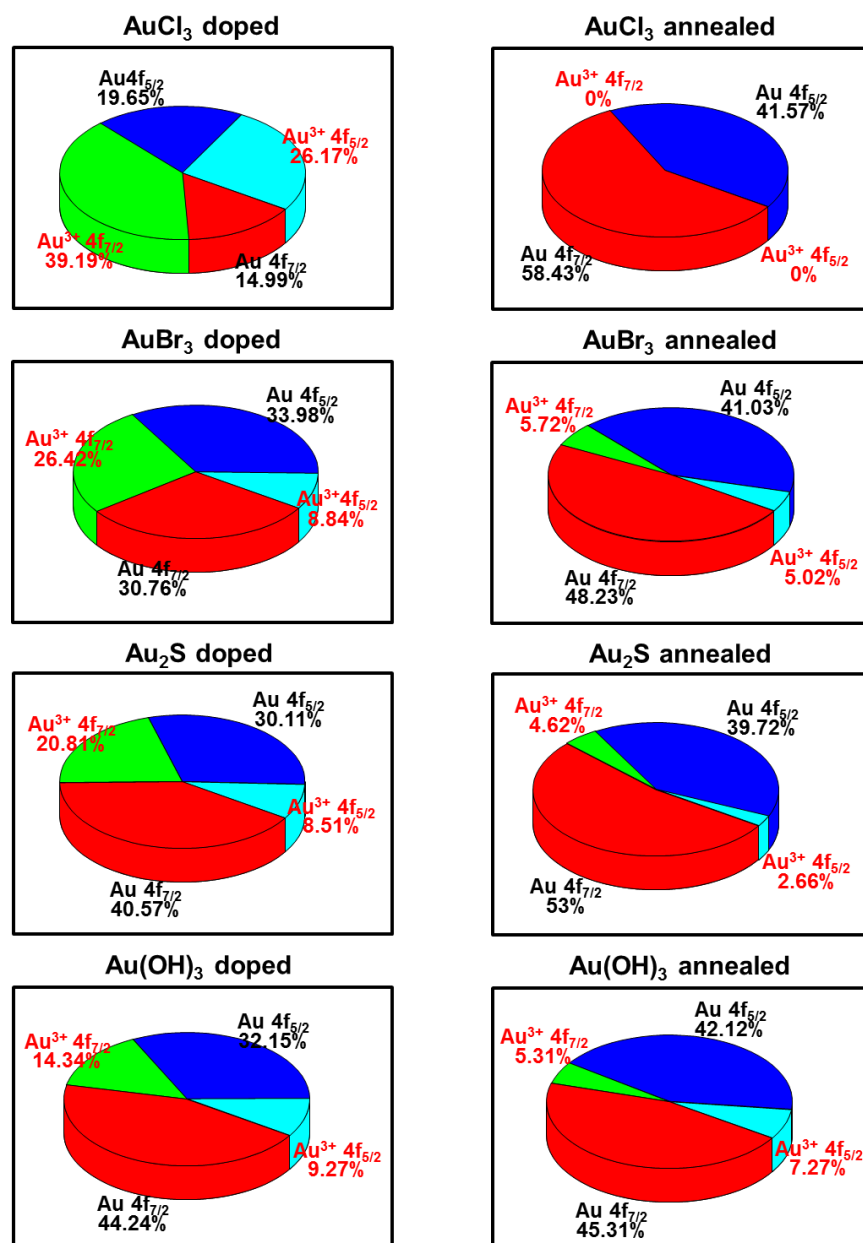

**Figure SI4.** The Au 4f peak separation was investigated. In the case of the Au complex doped graphene, the AuCl<sub>3</sub> had the largest ion peak, which was related to the degree of the decrease in the sheet resistance. But annealed AuCl<sub>3</sub> doped graphene sheet contained no gold ion peaks, indicating that they were completely degraded by thermal annealing.

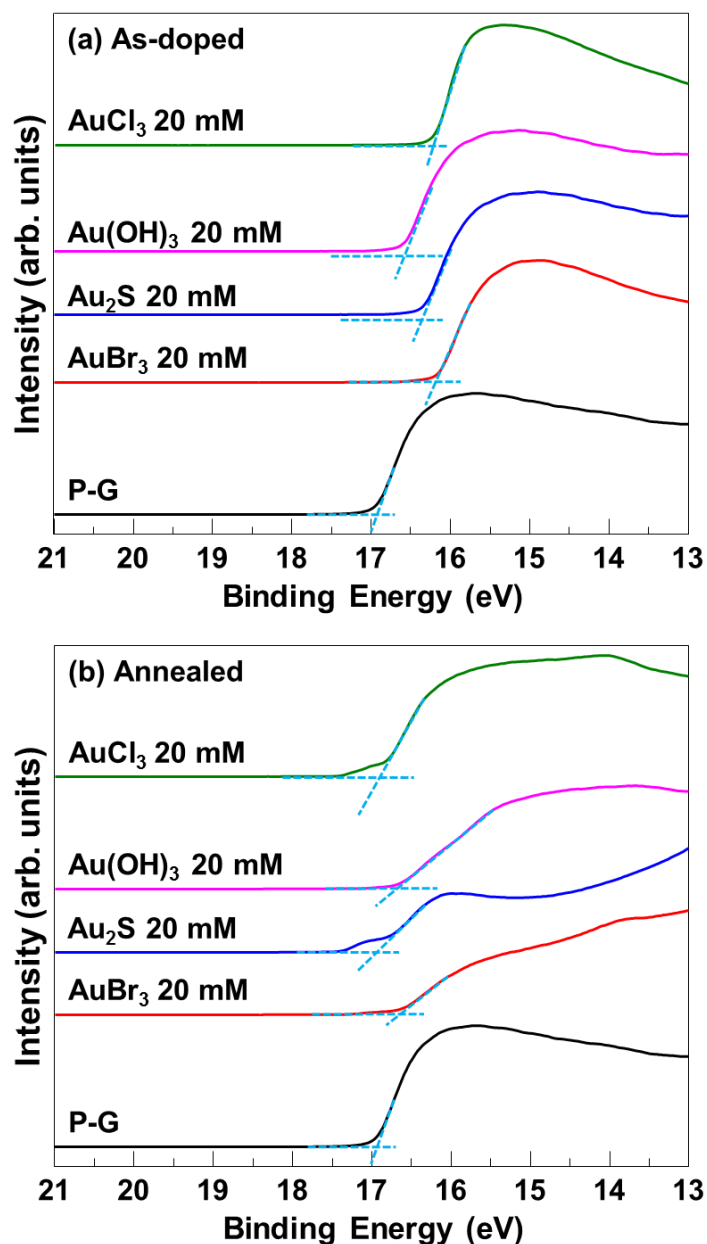

**Figure SI5.** The UPS spectra shows the secondary electron threshold energy differences. The  $\text{AuBr}_3$  doped graphene sheets had the lowest secondary electron threshold energy value, indicating that they have the highest work function value. But the annealed graphene sheets had a larger secondary electron threshold energy value than that of each doped graphene sheets. The  $\text{AuCl}_3$  doped graphene had the largest variance among the Au complex doped graphene sheets.
